## Proteogenomic analyses identify coagulation factor XI as a thromboinflammatory mediator of long COVID

Art Schuermans<sup>1,2,3,\*</sup>, Andreas Verstraete<sup>1,4</sup>, Vilma Lammi<sup>5</sup>, Tomoko Nakanishi<sup>6-10</sup>, Maddalena Ardissino<sup>11,12</sup>, Jef Van den Eynde<sup>1</sup>, Benjamin B. Sun<sup>13</sup>, Marios K. Georgakis<sup>2,14,15</sup>, Johan Van Weyenbergh<sup>16</sup>, Adam J. Lewandowski<sup>17</sup>, Betty Raman<sup>18</sup>, Hanna M. Ollila<sup>2,3,5,19</sup>, Stephen Burgess<sup>20</sup>, Pradeep Natarajan<sup>2,3,21</sup>, Michael C. Honigberg<sup>2,3,21</sup>, Kathleen Freson<sup>1</sup>, Thomas Vanassche<sup>1,4</sup>, Peter Verhamme<sup>1,4</sup>.

<sup>1</sup> KU Leuven Department of Cardiovascular Sciences, Center for Molecular and Vascular Biology, Leuven, Belgium

<sup>2</sup> Program in Medical and Population Genetics, Broad Institute of MIT and Harvard, Cambridge, MA, USA

<sup>3</sup> Center for Genomic Medicine, Massachusetts General Hospital, Boston, MA, USA

<sup>4</sup> UZ Leuven Department of Cardiovascular Diseases, Leuven, Belgium

<sup>5</sup> Institute for Molecular Medicine Finland, Helsinki Institute of Life Science, University of Helsinki, Helsinki, Finland

<sup>6</sup> Department of Human Genetics, McGill University, Montréal, QC, Canada

<sup>7</sup> Lady Davis Institute, Jewish General Hospital, McGill University, Montréal, QC, Canada

<sup>8</sup> Kyoto-McGill International Collaborative Program in Genomic Medicine, Graduate School of Medicine, Kyoto University, Kyoto, Japan

<sup>9</sup> Department of Genome Informatics, Graduate School of Medicine, the University of Tokyo, Tokyo, Japan

<sup>10</sup> Japan Society for the Promotion of Science, Tokyo, Japan

<sup>11</sup> BHF Cardiovascular Epidemiology Unit, Department of Public Health and Primary Care, University of Cambridge, Cambridge, UK

<sup>12</sup> National Heart and Lung Institute, Imperial College London, London, UK

<sup>13</sup> Department of Public Health and Primary Care, University of Cambridge, Cambridge, UK

<sup>14</sup> Institute for Stroke and Dementia Research, Ludwig Maximilian University of Munich, Munich, Germany

<sup>15</sup> Munich Cluster for Systems Neurology (SyNergy), Munich, Germany

<sup>16</sup> Laboratory of Clinical and Epidemiological Virology, Rega Institute for Medical Research, KU Leuven, Leuven, Belgium

<sup>17</sup> Nuffield Department of Population Health, University of Oxford, Oxford, UK

<sup>18</sup> Division of Cardiovascular Medicine, Radcliffe Department of Medicine, University of Oxford, Oxford, UK

<sup>19</sup> Anesthesia, Critical Care, and Pain Medicine, Massachusetts General Hospital and Harvard Medical School, Boston, USA

<sup>20</sup> MRC Biostatistics Unit, University of Cambridge, Cambridge, UK

<sup>21</sup> Department of Medicine, Harvard Medical School, Boston, MA, USA

**\*Correspondence to:**

Art Schuermans

KU Leuven Department of Cardiovascular Sciences

Center of Molecular and Vascular Biology

Herestraat 49 (box 911)

3000 Leuven, Belgium

Tel: +32 16 343491

Fax: +32 16 343493

Email: [aschuerm@broadinstitute.org](mailto:aschuerm@broadinstitute.org)

1 **Withdrawal statement**

2           The authors have withdrawn their manuscript due to analytical errors invalidating the  
3 main study findings. The authors of this work discovered the errors after submitting the initial  
4 version of the preprint. Therefore, the authors do not wish this work to be cited as reference  
5 for the project. If you have any questions, please contact the corresponding author.
